# Supplementary material for: Four new quaternary chalcogenides A2Ba7Sn4Q16 (A = Li, Na; Q = S, Se): syntheses, crystal structures determination, nonlinear optical performances investigation
Source: Royal Society of Chemistry journal article supplement (doi:10.1039/c7nj04288d), 2018-01-01
Supplement: c7nj04288d1.pdf [file c7nj04288d1.pdf]

**Four new quaternary chalcogenides  $A_2Ba_7Sn_4Q_{16}$  ( $A=Li, Na$ ;  $Q=S, Se$ ): syntheses,  
crystal structures, nonlinear optical performances**

Ailijiang Abudurusuli, Kui Wu,\* Shilie Pan\*

*Key Laboratory of Functional Materials and Devices for Special Environments  
of CAS; Xinjiang Key Laboratory of Electronic Information Materials and Devices;  
Xinjiang Technical Institute of Physics & Chemistry of CAS, 40-1 South Beijing Road,  
Urumqi 830011, China*

*To whom correspondence should be addressed :*

*E-mail: [sipan@ms.xjb.ac.cn](mailto:sipan@ms.xjb.ac.cn) (Shilie Pan).*

**Table S1.** Bond lengths (Å) and angles (deg.) for Na<sub>2</sub>Ba<sub>7</sub>Sn<sub>4</sub>S<sub>16</sub>.

|                     |            |                       |            |
|---------------------|------------|-----------------------|------------|
| Sn(1)-S(2)          | 2.379(9)   | S(1)#6-Ba(1)-S(1)#7   | 74.37(17)  |
| Sn(1)-S(1)#1        | 2.386(5)   | S(1)#2-Ba(1)-S(1)#7   | 129.91(13) |
| Sn(1)-S(1)          | 2.386(5)   | S(1)-Ba(1)-S(1)#7     | 141.58(18) |
| Sn(1)-S(1)#2        | 2.386(5)   | S(1)#6-Ba(1)-S(2)#8   | 156.27(15) |
| Sn(1)-Ba(1)#3       | 3.9412(17) | S(1)#2-Ba(1)-S(2)#8   | 74.39(14)  |
| Sn(1)-Ba(1)#4       | 3.9412(17) | S(1)-Ba(1)-S(2)#8     | 73.71(14)  |
| Sn(1)-Ba(2)#1       | 4.0616(12) | S(1)#7-Ba(1)-S(2)#8   | 84.51(17)  |
| Sn(1)-Ba(2)#5       | 4.0616(11) | S(1)#6-Ba(1)-S(2)#9   | 74.39(14)  |
| Ba(1)-S(1)#6        | 3.152(5)   | S(1)#2-Ba(1)-S(2)#9   | 156.27(15) |
| Ba(1)-S(1)#2        | 3.152(5)   | S(1)-Ba(1)-S(2)#9     | 84.51(17)  |
| Ba(1)-S(1)          | 3.203(4)   | S(1)#7-Ba(1)-S(2)#9   | 73.71(14)  |
| Ba(1)-S(1)#7        | 3.203(4)   | S(2)#8-Ba(1)-S(2)#9   | 110.29(14) |
| Ba(1)-S(2)#8        | 3.224(4)   | S(1)#6-Ba(1)-S(1)#10  | 67.02(6)   |
| Ba(1)-S(2)#9        | 3.224(4)   | S(1)#2-Ba(1)-S(1)#10  | 67.02(6)   |
| Ba(1)-S(1)#10       | 3.594(5)   | S(1)-Ba(1)-S(1)#10    | 70.92(14)  |
| Ba(1)-S(1)#11       | 3.594(5)   | S(1)#7-Ba(1)-S(1)#10  | 141.38(16) |
| S(1)-Na(1)          | 2.688(5)   | S(2)#8-Ba(1)-S(1)#10  | 132.98(17) |
| S(1)-Ba(1)#3        | 3.152(5)   | S(2)#9-Ba(1)-S(1)#10  | 96.16(8)   |
| S(1)-Ba(1)#13       | 3.594(5)   | S(1)#6-Ba(1)-S(1)#11  | 67.02(6)   |
| S(2)-Ba(1)#14       | 3.224(4)   | S(1)#2-Ba(1)-S(1)#11  | 67.02(6)   |
| S(2)-Ba(1)#15       | 3.224(4)   | S(1)-Ba(1)-S(1)#11    | 141.38(16) |
| S(2)-Ba(1)#16       | 3.224(4)   | S(1)#7-Ba(1)-S(1)#11  | 70.92(14)  |
| Na(1)-S(1)#17       | 2.688(5)   | S(2)#8-Ba(1)-S(1)#11  | 96.16(8)   |
| Na(1)-S(1)#18       | 2.688(5)   | S(2)#9-Ba(1)-S(1)#11  | 132.98(17) |
| Na(1)-S(1)#10       | 2.688(5)   | S(1)#10-Ba(1)-S(1)#11 | 92.68(16)  |
| S(2)-Sn(1)-S(1)#1   | 111.62(11) | S(1)-Na(1)-S(1)#17    | 94.77(5)   |
| S(2)-Sn(1)-S(1)     | 111.62(11) | S(1)-Na(1)-S(1)#18    | 146.49(19) |
| S(1)#1-Sn(1)-S(1)   | 107.24(12) | S(1)#17-Na(1)-S(1)#18 | 94.77(5)   |
| S(2)-Sn(1)-S(1)#2   | 111.62(11) | S(1)-Na(1)-S(1)#10    | 94.77(5)   |
| S(1)#1-Sn(1)-S(1)#2 | 107.24(12) | S(1)#17-Na(1)-S(1)#10 | 146.49(19) |
| S(1)-Sn(1)-S(1)#2   | 107.24(12) | S(1)#18-Na(1)-S(1)#10 | 94.77(5)   |
| S(1)#6-Ba(1)-S(1)#2 | 111.13(17) | S(1)-Na(1)-S(2)       | 63.34(15)  |
| S(1)#6-Ba(1)-S(1)   | 129.91(13) | S(1)#17-Na(1)-S(2)    | 140.36(9)  |
| S(1)#2-Ba(1)-S(1)   | 74.37(17)  | S(1)#18-Na(1)-S(2)    | 89.55(14)  |
| S(1)#10-Na(1)-S(2)  | 71.73(10)  |                       |            |

Symmetry transformations used to generate equivalent atoms:

|                             |                             |
|-----------------------------|-----------------------------|
| #1 $z-1/2, -x+1/2, -y+1$    | #2 $-y+1/2, -z+1, x+1/2$    |
| #3 $z-1/2, x+1/2, y-1/2$    | #4 $y-1, -z+1, -x+1/2$      |
| #5 $-y+1/2, z+0, -x+1$      | #6 $y-1/2, z+1/2, x+1/2$    |
| #7 $-x+0, -y+3/2, z+0$      | #8 $-y+1/4, -x+3/4, z-1/4$  |
| #9 $y-1/4, x+3/4, z-1/4$    | #10 $z-1/4, -y+5/4, -x+3/4$ |
| #11 $-z+1/4, y+1/4, -x+3/4$ | #12 $y-3/4, -x+3/4, -z+5/4$ |
| #13 $-z+3/4, y-1/4, -x+1/4$ | #14 $z-1/4, y-1/4, x+3/4$   |

#15  $-x+1/4, -z+3/4, y-1/4$       #16  $y-3/4, x+1/4, z+1/4$   
 #17  $-z+3/4, -y+5/4, x+1/4$       #18  $-x+1/2, y+0, -z+1$

**Table S2.** Bond lengths (Å) and angles (deg) for  $\text{Li}_2\text{Ba}_7\text{Sn}_4\text{S}_{16}$ .

|                     |           |                       |            |
|---------------------|-----------|-----------------------|------------|
| Sn(1)-S(2)          | 2.353(5)  | S(2)#7-Ba(1)-S(1)#2   | 157.21(9)  |
| Sn(1)-S(1)#1        | 2.393(3)  | S(1)#8-Ba(1)-S(1)#2   | 109.56(11) |
| Sn(1)-S(1)          | 2.393(3)  | S(2)#6-Ba(1)-S(1)     | 73.30(9)   |
| Sn(1)-S(1)#2        | 2.393(3)  | S(2)#7-Ba(1)-S(1)     | 87.40(10)  |
| Ba(1)-S(2)#6        | 3.120(2)  | S(1)#8-Ba(1)-S(1)     | 129.50(9)  |
| Ba(1)-S(2)#7        | 3.120(2)  | S(1)#2-Ba(1)-S(1)     | 72.95(11)  |
| Ba(1)-S(1)#8        | 3.229(3)  | S(2)#6-Ba(1)-S(1)#9   | 87.40(10)  |
| Ba(1)-S(1)#2        | 3.229(3)  | S(2)#7-Ba(1)-S(1)#9   | 73.30(9)   |
| Ba(1)-S(1)          | 3.277(3)  | S(1)#8-Ba(1)-S(1)#9   | 72.95(11)  |
| Ba(1)-S(1)#9        | 3.277(3)  | S(1)#2-Ba(1)-S(1)#9   | 129.50(9)  |
| Ba(1)-S(1)#10       | 3.451(3)  | S(1)-Ba(1)-S(1)#9     | 145.42(11) |
| Ba(1)-S(1)#11       | 3.451(3)  | S(2)#6-Ba(1)-S(1)#10  | 130.99(11) |
| S(1)-Li(1)          | 2.480(3)  | S(2)#7-Ba(1)-S(1)#10  | 93.77(6)   |
| S(1)-Ba(1)#5        | 3.229(3)  | S(1)#8-Ba(1)-S(1)#10  | 68.18(4)   |
| S(1)-Ba(1)#13       | 3.451(3)  | S(1)#2-Ba(1)-S(1)#10  | 68.18(4)   |
| S(2)-Ba(1)#14       | 3.120(2)  | S(1)-Ba(1)-S(1)#10    | 66.75(9)   |
| S(2)-Ba(1)#15       | 3.120(2)  | S(1)#9-Ba(1)-S(1)#10  | 141.07(10) |
| S(2)-Ba(1)#16       | 3.120(2)  | S(2)#6-Ba(1)-S(1)#11  | 93.77(6)   |
| Li(1)-S(1)#17       | 2.480(3)  | S(2)#7-Ba(1)-S(1)#11  | 130.99(11) |
| Li(1)-S(1)#10       | 2.480(3)  | S(1)#8-Ba(1)-S(1)#11  | 68.18(4)   |
| Li(1)-S(1)#18       | 2.480(3)  | S(1)#2-Ba(1)-S(1)#11  | 68.18(4)   |
| S(2)-Sn(1)-S(1)#1   | 111.05(8) | S(1)-Ba(1)-S(1)#11    | 141.07(10) |
| S(2)-Sn(1)-S(1)     | 111.05(8) | S(1)#9-Ba(1)-S(1)#11  | 66.75(9)   |
| S(1)#1-Sn(1)-S(1)   | 107.84(8) | S(1)#10-Ba(1)-S(1)#11 | 99.73(11)  |
| S(2)-Sn(1)-S(1)#2   | 111.05(8) | S(1)#17-Li(1)-S(1)    | 140.30(14) |
| S(1)#1-Sn(1)-S(1)#2 | 107.84(8) | S(1)#17-Li(1)-S(1)#10 | 96.62(5)   |
| S(1)-Sn(1)-S(1)#2   | 107.84(8) | S(1)-Li(1)-S(1)#10    | 96.62(5)   |
| S(2)#6-Ba(1)-S(2)#7 | 111.91(9) | S(1)#17-Li(1)-S(1)#18 | 96.62(5)   |
| S(2)#6-Ba(1)-S(1)#8 | 157.21(9) | S(1)-Li(1)-S(1)#18    | 96.62(5)   |
| S(2)#7-Ba(1)-S(1)#8 | 73.97(9)  | S(1)#10-Li(1)-S(1)#18 | 140.30(14) |
| S(2)#6-Ba(1)-S(1)#2 | 73.97(9)  |                       |            |

Symmetry transformations used to generate equivalent atoms:

#1  $z-1/2, -x+1/2, -y+1$       #2  $-y+1/2, -z+1, x+1/2$   
 #3  $-y+1/2, z+0, -x+1$       #4  $y-1, -z+1, -x+1/2$   
 #5  $z-1/2, x+1/2, y-1/2$       #6  $-y+1/4, -x+3/4, z-1/4$   
 #7  $y-1/4, x+3/4, z-1/4$       #8  $y-1/2, z+1/2, x+1/2$   
 #9  $-x+0, -y+3/2, z+0$       #10  $z-1/4, -y+5/4, -x+3/4$   
 #11  $-z+1/4, y+1/4, -x+3/4$       #12  $y-3/4, -x+3/4, -z+5/4$   
 #13  $-z+3/4, y-1/4, -x+1/4$       #14  $z-1/4, y-1/4, x+3/4$

#15  $y-3/4, x+1/4, z+1/4$       #16  $-x+1/4, -z+3/4, y-1/4$   
#17  $-x+1/2, y+0, -z+1$       #18  $-z+3/4, -y+5/4, x+1/4$

---

**Table S3.** Bond lengths (Å) and angles (deg) for Na<sub>2</sub>Ba<sub>7</sub>Sn<sub>4</sub>Se<sub>16</sub>.

---

Sn(1)-Se(1)

2.498(3)

Sn(1)-Se(2)

2.5239(16)

---

---

Sn(1)-Se(2)#1 2.5239(16)

Sn(1)-Se(2)#2 2.5239(16)

Ba(1)-Se(2)#3 3.2662(18)

---

---

Ba(1)-Se(2)#4

3.2662(18)

Ba(1)-Se(2)#5

3.3178(16)

---

---

Ba(1)-Se(2)#6

3.3178(16)

Ba(1)-Se(1)

3.3651(16)

---

---

Ba(1)-Se(1)#7

3.3651(16)

Ba(1)-Se(2)#8

3.7222(19)

---



---

Ba(1)-Se(2)#9

3.7222(19)

Se(2)-Na(1)

2.8061(16)

---

---

Se(2)-Ba(1)#10

3.2662(18)

Se(2)-Ba(1)#11

3.3178(16)

---

---

Se(2)-Ba(1)#12

3.7222(19)

Se(1)-Ba(1)#2

3.3651(16)

Se(1)-Ba(1)#13

3.3651(16)

---

---

Na(1)-Se(2)#14

2.8061(16)

Na(1)-Se(2)#15

2.8061(16)

---

---

Na(1)-Se(2)#16

2.8061(16)

Se(1)-Sn(1)-Se(2)

111.35(5)

---

---

Se(1)-Sn(1)-Se(2)#1

111.35(5)

Se(2)-Sn(1)-Se(2)#1

107.52(5)

---

---

Se(1)-Sn(1)-Se(2)#2

111.35(5)

Se(2)-Sn(1)-Se(2)#2

107.52(5)

---

---

Se(2)#1-Sn(1)-Se(2)#2

107.52(5)

Se(2)#3-Ba(1)-Se(2)#4

110.36(7)

---



---

Se(2)#3-Ba(1)-Se(2)#5

128.92(4)

Se(2)#4-Ba(1)-Se(2)#5

76.39(5)

---

Se(2)#3-Ba(1)-Se(2)#6

76.39(5)

Symmetry transformations used to generate equivalent atoms:

- #1  $-y+1, z-1/2, -x+3/2$     #2  $-z+3/2, -x+1, y+1/2$   
 #3  $z-3/4, -y+3/4, -x+5/4$     #4  $-z+7/4, y-1/4, -x+5/4$   
 #5  $-y+5/4, -x+3/4, z-1/4$     #6  $y-1/4, x-1/4, z-1/4$   
 #7  $-x+1, -y+1/2, z+0$     #8  $y, z-1, x$     #9  $-y+1, -z+3/2, x+0$   
 #10  $-z+5/4, y+1/4, -x+7/4$     #11  $y+1/4, x+1/4, z+1/4$   
 #12  $z, x, y+1$     #13  $y+1/2, z-1/2, x+1/2$   
 #14  $-z+7/4, -y+5/4, x+1/4$     #15  $z-1/4, -y+5/4, -x+7/4$   
 #16  $-x+3/2, y+0, -z+2$     #17  $y+3/4, -x+5/4, -z+7/4$

**Table S4.** Bond lengths (Å) and angles (deg) for  $\text{Li}_2\text{Ba}_7\text{Sn}_4\text{Se}_{16}$ .

|                       |            |                       |            |
|-----------------------|------------|-----------------------|------------|
| Sn(1)-Se(2)           | 2.4818(16) | Se(2)#3-Ba(1)-Se(1)#1 | 74.16(2)   |
| Sn(1)-Se(1)#1         | 2.5215(8)  | Se(2)#4-Ba(1)-Se(1)#1 | 157.94(2)  |
| Sn(1)-Se(1)#2         | 2.5215(8)  | Se(1)#5-Ba(1)-Se(1)#1 | 109.75(3)  |
| Sn(1)-Se(1)           | 2.5215(8)  | Se(2)#3-Ba(1)-Se(1)#6 | 85.47(3)   |
| Ba(1)-Se(2)#3         | 3.2714(7)  | Se(2)#4-Ba(1)-Se(1)#6 | 73.57(2)   |
| Ba(1)-Se(2)#4         | 3.2714(7)  | Se(1)#5-Ba(1)-Se(1)#6 | 75.19(3)   |
| Ba(1)-Se(1)#5         | 3.3325(9)  | Se(1)#1-Ba(1)-Se(1)#6 | 128.46(2)  |
| Ba(1)-Se(1)#1         | 3.3325(9)  | Se(2)#3-Ba(1)-Se(1)   | 73.57(2)   |
| Ba(1)-Se(1)#6         | 3.3768(8)  | Se(2)#4-Ba(1)-Se(1)   | 85.47(3)   |
| Ba(1)-Se(1)           | 3.3768(8)  | Se(1)#5-Ba(1)-Se(1)   | 128.46(2)  |
| Ba(1)-Se(1)#7         | 3.5664(10) | Se(1)#1-Ba(1)-Se(1)   | 75.19(3)   |
| Ba(1)-Se(1)#8         | 3.5664(10) | Se(1)#6-Ba(1)-Se(1)   | 142.87(4)  |
| Se(1)-Li(1)           | 2.5841(8)  | Se(2)#3-Ba(1)-Se(1)#7 | 130.66(3)  |
| Se(1)-Ba(1)#10        | 3.3325(9)  | Se(2)#4-Ba(1)-Se(1)#7 | 94.662(14) |
| Se(1)-Ba(1)#11        | 3.5664(10) | Se(1)#5-Ba(1)-Se(1)#7 | 68.220(13) |
| Se(2)-Ba(1)#12        | 3.2714(7)  | Se(1)#1-Ba(1)-Se(1)#7 | 68.220(13) |
| Se(2)-Ba(1)#13        | 3.2714(7)  | Se(1)#6-Ba(1)-Se(1)#7 | 143.38(3)  |
| Se(2)-Ba(1)#14        | 3.2714(7)  | Se(1)-Ba(1)-Se(1)#7   | 66.92(2)   |
| Li(1)-Se(1)#7         | 2.5841(8)  | Se(2)#3-Ba(1)-Se(1)#8 | 94.662(14) |
| Li(1)-Se(1)#15        | 2.5841(8)  | Se(2)#4-Ba(1)-Se(1)#8 | 130.66(3)  |
| Li(1)-Se(1)#16        | 2.5841(8)  | Se(1)#5-Ba(1)-Se(1)#8 | 68.220(13) |
| Se(2)-Sn(1)-Se(1)#1   | 110.41(2)  | Se(1)#1-Ba(1)-Se(1)#8 | 68.220(13) |
| Se(2)-Sn(1)-Se(1)#2   | 110.41(2)  | Se(1)#6-Ba(1)-Se(1)#8 | 66.92(2)   |
| Se(1)#1-Sn(1)-Se(1)#2 | 108.52(2)  | Se(1)-Ba(1)-Se(1)#8   | 143.38(3)  |
| Se(2)-Sn(1)-Se(1)     | 110.41(2)  | Se(1)-Li(1)-Se(1)#7   | 95.700(10) |
| Se(1)#1-Sn(1)-Se(1)   | 108.52(2)  | Se(1)-Li(1)-Se(1)#15  | 143.26(3)  |

|                       |           |                         |            |
|-----------------------|-----------|-------------------------|------------|
| Se(1)#2-Sn(1)-Se(1)   | 108.52(2) | Se(1)#7-Li(1)-Se(1)#15  | 95.700(10) |
| Se(2)#3-Ba(1)-Se(2)#4 | 110.75(3) | Se(1)-Li(1)-Se(1)#16    | 95.700(10) |
| Se(2)#3-Ba(1)-Se(1)#5 | 157.94(2) | Se(1)#7-Li(1)-Se(1)#16  | 143.26(3)  |
| Se(2)#4-Ba(1)-Se(1)#5 | 74.16(2)  | Se(1)#15-Li(1)-Se(1)#16 | 95.700(10) |

Symmetry transformations used to generate equivalent atoms:

- |                             |                             |
|-----------------------------|-----------------------------|
| #1 $-y+1/2, -z+1, x+1/2$    | #2 $z-1/2, -x+1/2, -y+1$    |
| #3 $-y+1/4, -x+3/4, z-1/4$  | #4 $y-1/4, x+3/4, z-1/4$    |
| #5 $y-1/2, z+1/2, x+1/2$    | #6 $-x+0, -y+3/2, z+0$      |
| #7 $z-1/4, -y+5/4, -x+3/4$  | #8 $-z+1/4, y+1/4, -x+3/4$  |
| #9 $y-3/4, -x+3/4, -z+5/4$  | #10 $z-1/2, x+1/2, y-1/2$   |
| #11 $-z+3/4, y-1/4, -x+1/4$ | #12 $z-1/4, y-1/4, x+3/4$   |
| #13 $y-3/4, x+1/4, z+1/4$   | #14 $-x+1/4, -z+3/4, y-1/4$ |
| #15 $-x+1/2, y+0, -z+1$     | #16 $-z+3/4, -y+5/4, x+1/4$ |

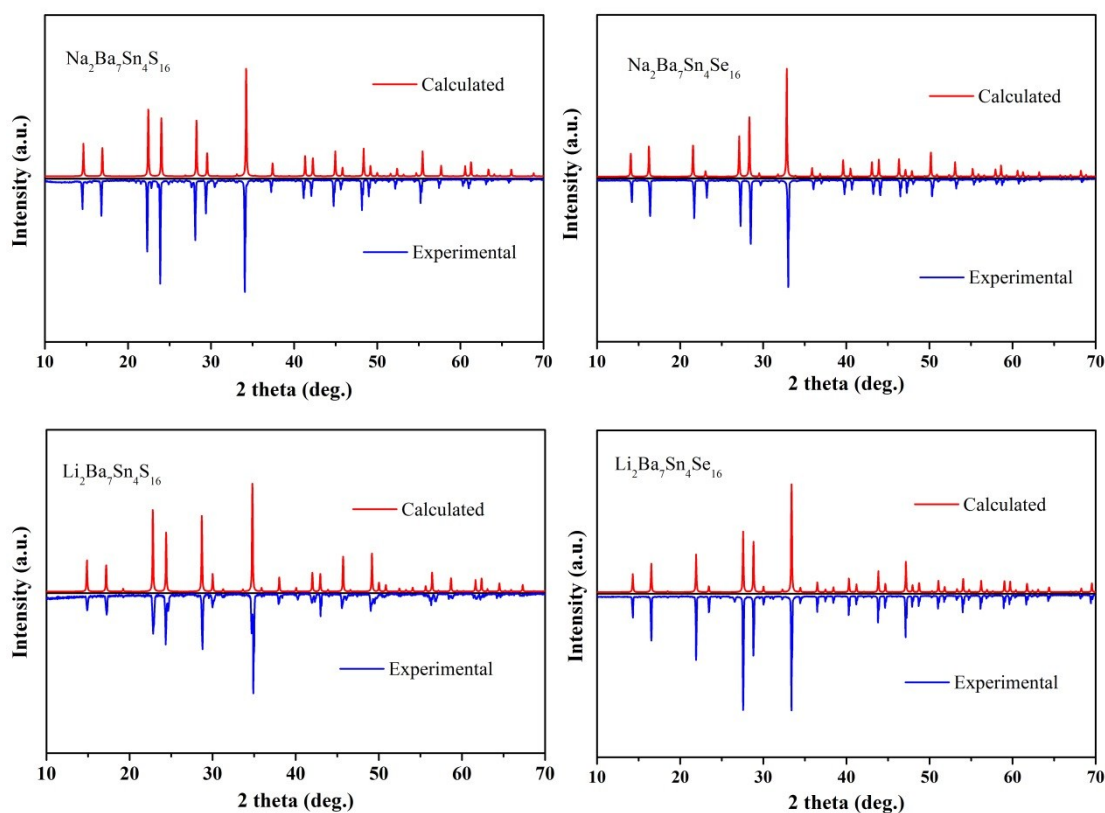

**Fig. S1.** Powder X-ray diffraction patterns of A<sub>2</sub>Ba<sub>7</sub>Sn<sub>4</sub>Q<sub>16</sub> (A=Li, Na; Q=S, Se)

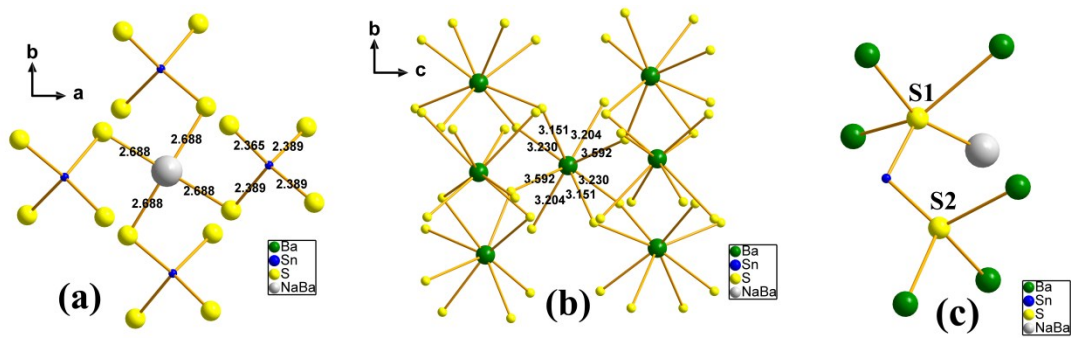

**Fig. S2.** (a)View environment of the Na/BaS<sub>4</sub> and SnS<sub>4</sub> tetrahedra with the bound distances. (b) The environment of Ba atoms, and Ba-S bound distances. (c) Two different coordination environments of S atoms.

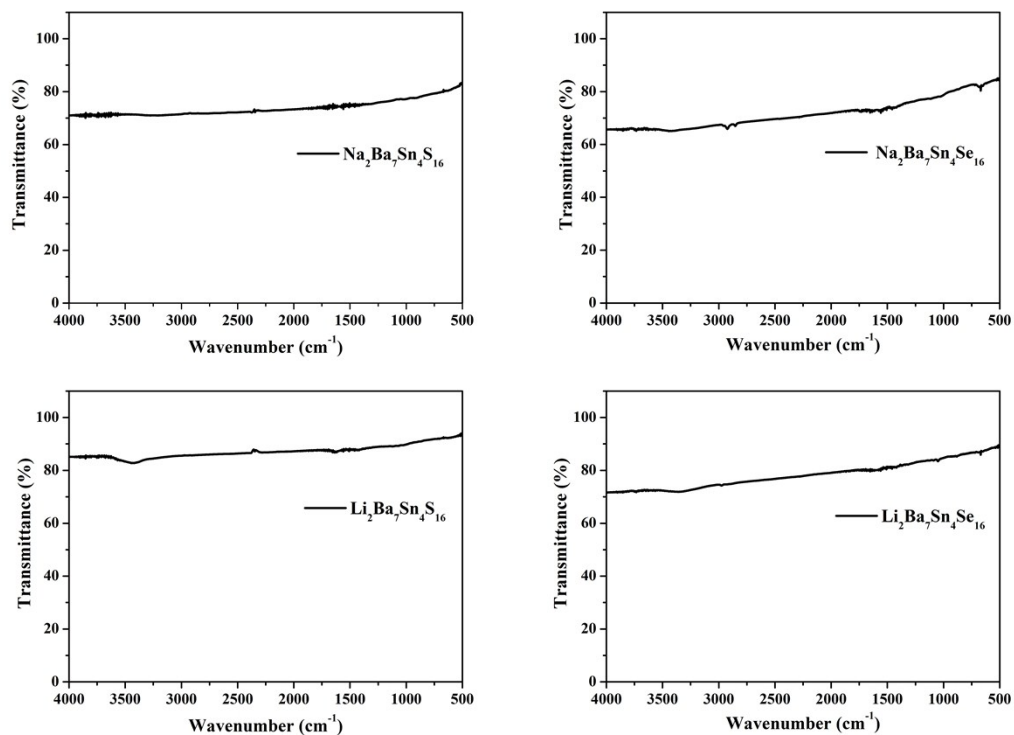

**Fig. S3.** IR spectra of title compounds.
